## PERSPECTIVAS

### NOTA DEL EDITOR

#### 329 **Mejoramiento de la vida de los pacientes con depresión mayor centrándose en nuevos enfoques de tratamiento**

*Ned H. Kalin, M.D.*

### EDITORIALES

#### 331 **Heterogeneidad en el trastorno depresivo mayor: Lecciones de las investigaciones sobre el desarrollo en el caso de la irritabilidad**

*Daniel S. Pine, M.D.*

#### 333 **Nuevo conocimiento de los mecanismos de los efectos antidepresivos de la ketamina: Comprensión del papel del factor de crecimiento endotelial vascular (VGEF) en la mediación de procesos de plasticidad**

*Margaux M. Kenwood, B.A., et al.*

### COMENTARIO

#### 336 **Oportunidades para mejorar el acceso a tratamientos de la depresión basados en la evidencia**

*Myrna M. Weissman, Ph.D., et al.*

### PERSPECTIVAS EN SALUD MENTAL GLOBAL

#### 338 **El concepto de manía en la cultura andina tradicional**

*Marucela Juana Uscamayta Ayvar, M.Sc., et al.*

### IMÁGENES EN PSIQUIATRÍA

#### 341 **Vladimir Horowitz, 1903–1989**

*Anne R. Hart, M.D., Charles H. Kellner, M.D.*

### REVISIÓN Y RESEÑAS

#### 342 **Temas científicos importantes para mejorar el diagnóstico, la evaluación de riesgos y el tratamiento de la depresión mayor**

*Alan F. Schatzberg, M.D.*

Se proponen nuevas dimensiones de los criterios y nuevos diseños metodológicos y experimentales para abordar cómo pueden desarrollarse y evaluarse nuevos enfoques de tratamiento.

## NUEVAS INVESTIGACIONES

### ARTÍCULOS

#### 348 **Moderadores y predictores generales de remisión de la depresión: Un informe de VAST-D**

*Sidney Zisook, M.D., et al.*

Dado que la mayoría de los pacientes no alcanzan la remisión con el tratamiento inicial, es un imperativo clínico encontrar factores que predigan cuál de tres medicamentos que se utilizan como el siguiente paso para aumentar las tasas de remisión son los mejores para pacientes individuales.

#### 358 **La irritabilidad y su utilidad clínica en el trastorno de depresión mayor: Predicción de resultados de la fase aguda a nivel individual utilizando cambios tempranos en la gravedad de la depresión y la irritabilidad**

*Manish K. Jha, M.B.B.S., et al.* EDITORIALE • EMC • AUDIO • VIDEO

Se evaluó la utilidad clínica de adicionar irritabilidad al paradigma actual para medir la gravedad de los síntomas depresivos durante el curso del tratamiento antidepresivo.

#### 367 **Trayectorias de respuesta a EMTr prefrontal dorsolateral en depresión mayor: Un estudio TRES-D**

*Tyler S. Kaster, M.D., et al.*

Las características clínicas antes del tratamiento (línea base), y no la forma de la estimulación magnética transcraniana repetitiva (EMTr), fueron superiores para predecir los resultados clínicos en pacientes con trastorno de depresión mayor que recibieron dos formas diferentes de EMTr.

**376 No hay respaldo para las hipótesis de genes candidatos históricos ni de genes candidatos por interacción para la depresión mayor en múltiples muestras grandes**

*Richard Border, M.A., et al.* **EMC**

Parece que no hay evidencia para apoyar las interacciones replicables entre genes candidatos para depresión y fenotipos de depresión. Las interacciones de este tipo que se han reportado en investigaciones en genética pueden representar falsos positivos.

**388 Papel de la señalización neuronal del VEGF en la corteza prefrontal en los efectos antidepresivos rápidos de la ketamina**

*Satoshi Deyama, Ph.D., et al.* **EDITORIALE • VIDEO**

La actividad del factor de crecimiento endotelial vascular (VEGF) en la corteza prefrontal medial (mPFC) media las acciones sobre el comportamiento y neurotróficas de la ketamina. Las infusiones intra-CPFM del VEGF pueden producir efectos rápidos sobre el comportamiento similares a los de la ketamina, que son bloqueados por la delección del receptor Flk-1.

**401 Infusiones de ketamina sencillas, repetidas y de mantenimiento para la depresión resistente al tratamiento: Un ensayo controlado aleatorizado**

*Jennifer L. Phillips, Ph.D., et al.* **EMC**

La primera comparación directa de tasas de respuesta para infusiones de ketamina sencillas y repetidas mostraron restauración de la respuesta antidepresiva después de la recaída de síntomas depresivos.

**COMUNICADOS Y ACTUALIZACIONES**

**410 Explicación de la interferencia de la naltrexona con el efecto antidepresivo de la ketamina**

*Michael Wang, B.Sc., Adam Kaplin, M.D., Ph.D.*

**412 Los modelos traslacionales rigurosos son esenciales para estudiar el mecanismo antidepresivo de la ketamina: Respuesta a Wang y Kaplin**

*Boris D. Heifets, M.D., Ph.D., et al.*

**412 Aviso a los consumidores sobre las pruebas genéticas que dicen predecir la respuesta a los medicamentos: Implicaciones para la psiquiatría**

*Joshua D. Rosenblat, M.D., et al.*

**414 Libros recibidos**

**OTROS TEMAS DE INTERÉS**

**414 [Correction to Mackey et al.]**

**415 Educación Médica Continuada**

**Cubierta:** [A cellular model for the rapid and sustained behavioral actions of ketamine reported by Deyama et al. (p. 388) showing regulation of vascular endothelial growth factor (VEGF) release and fetal liver kinase 1 (Flk-1) signaling.]

**AUDIO** Article is highlighted in AJP Audio, a downloadable .mp3 file available at [ajp.psychiatryonline.org](http://ajp.psychiatryonline.org)

**EDITORIALE** Article is discussed in one of the issue's editorials

**EMC** A course covering the content of this article is available online for paid subscribers to the AJP CME Course program

**VIDEO** Article is highlighted online by Deputy Editor Daniel S. Pine, M.D.

**La Tabla de Contenidos y resúmenes de Este Número Está Disponible en Español**

*(Abstracts are also available in Spanish)*

Translation presented in collaboration with the Office of Global Health, Rutgers-Robert Wood Johnson Medical School. Support for this effort provided by ACTA Colombia.

**Translation courtesy of**

**Sergi Casals, M.A.**, Garuna, Medellín, Colombia ([www.garunaeditors.com](http://www.garunaeditors.com))

**Carlos López Jaramillo, M.D., M.Sc., Ph.D.**, Universidad de Antioquia, Medellín, Colombia

**Javier I. Escobar, M.D., M.Sc.**, Rutgers-Robert Wood Johnson Medical School

## Temas científicos importantes para mejorar el diagnóstico, la evaluación de riesgos y el tratamiento de la depresión mayor

Alan F. Schatzberg, M.D.

En las dos últimas décadas, la investigación sobre la biología y el tratamiento de la depresión mayor ha conducido a varios avances en nuestra comprensión de la biología del trastorno y en el desarrollo de varios tratamientos nuevos. Si bien se ha progresado, han surgido varios aspectos clave en relación al diagnóstico del trastorno y a cómo desarrollamos y evaluamos nuevas terapias. Estos incluyen: la necesidad potencial de incluir nuevas dimensiones en los criterios diagnósticos, la utilidad limitada de los predictores clínicos de respuesta, la eliminación de ensayos ciegos tradicionales en depresión

mayor, y la pregunta de si los modelos pre-clínicos nos dicen mucho acerca del desarrollo de nuevos medicamentos. Es necesario abordar estos temas para evitar que el campo tome vías de investigación y tratamiento que en realidad pudieran confundir o desviar nuestros esfuerzos para desarrollar mejores herramientas de diagnóstico y tratamientos más efectivos. Se proponen posibles soluciones a estos problemas.

*(Am J Psychiatry 2019; 176:342–347)*

## Moderadores y predictores generales de remisión de la depresión: Un informe de VAST-D

Sidney Zisook, M.D., Gary R. Johnson, M.S., Ilanit Tal, Ph.D., Paul Hicks, M.D., Ph.D., Peijun Chen, M.D., Ph.D., Lori Davis, M.D., Michael Thase, M.D., Yinjun Zhao, Ph.D., Julia Vertrees, Pharm.D., Somaia Mohamed, M.D., Ph.D.

**Objetivo:** Casi dos tercios de los pacientes con trastorno de depresión mayor no alcanzan la remisión con los tratamientos iniciales. Por este motivo, identificar y ofrecer tratamientos subsiguientes factibles y efectivos son imperativos clínicos. Este estudio explora las características de los pacientes antes del tratamiento que podrían ayudar a los clínicos a seleccionar los tratamientos subsiguientes.

**Método:** Los autores utilizaron datos del estudio de tratamientos de aumentos y cambios para mejorar la depresión, del Departamento de Asuntos para Veteranos (*Veteran Affairs*, VA) de los Estados Unidos, denominado estudio VAST-D. Se trata de un ensayo ciego sencillo, aleatorizado y multicéntrico, de 1.522 pacientes de la Administración de Salud de Veteranos, que no tuvieron una respuesta adecuada por lo menos a un tratamiento que cumpliera los estándares mínimos de dosificación y duración. Por 12 semanas, los participantes recibieron uno de tres tratamientos posibles: cambio a otro antidepresivo—bupropion de liberación sostenida; combinación con otro antidepresivo—bupropion de liberación sostenida; o aumento con un antipsicótico—aripiprazole. Se utilizaron modelos de regresión de tablas de mortalidad para identificar características antes del tratamiento asociadas a la remisión

general (predictores generales) y su interacción con la remisión entre los tres grupos de tratamiento (moderadores).

**Resultados:** Se observó una probabilidad más alta de remisión en el caso de individuos que tenían empleo, cuya depresión era menos severa, menos crónica, que eran menos ansiosos, que no tenían síntomas de duelo complicados, que no experimentaron adversidades en la infancia y que tenían mejor calidad de vida y una salud mental más positiva. Dos características sugirieron selecciones de tratamiento para el próximo paso: edad  $\geq 65$  años (para quienes el aumento con aripiprazole fue más efectivo que el cambio a bupropion) y síntomas hipomaniacos mixtos graves (para los que el aumento con aripiprazole y la combinación con bupropion fueron más efectivos que el cambio a bupropion).

**Conclusiones:** Si se replican, estos hallazgos preliminares podrían ayudar a los clínicos a determinar cuáles pacientes con depresión que requieren tratamiento adicional, se beneficiarían más de un aumento, una combinación o un cambio de tratamiento.

(*Am J Psychiatry* 2019; 176:348–357)

# La irritabilidad y su utilidad clínica en el trastorno de depresión mayor: Predicción de resultados de la fase aguda a nivel individual utilizando cambios tempranos en la gravedad de la depresión y la irritabilidad

Manish K. Jha, M.B.B.S., Abu Minhajuddin, Ph.D., Charles South, Ph.D., A. John Rush, M.D., Madhukar H. Trivedi, M.D.

**Objetivo:** Los autores evaluaron la mejoría en irritabilidad con tratamiento antidepresivo y su pronóstico en pacientes ambulatorios adultos con trastorno de depresión mayor que buscan tratamiento.

**Método:** Se utilizaron análisis de modelos mixtos para evaluar los cambios en la irritabilidad (medidos con el dominio de irritabilidad de cinco ítems de la escala de Rastreo Conciso de Síntomas Asociados [CAST-IRR, por sus siglas en inglés]) desde el inicio hasta la semana 4 después de controlar la variable de la gravedad de la depresión (medida con el Inventario Rápido de Sintomatología Depresiva–Evaluada por el Clínico [QIDS-C, por sus siglas en inglés] en el ensayo Combinación de Medicamentos para Mejorar los Resultados de la Depresión [CO-MED, por sus siglas en inglés] (N=664). Se desarrolló una calculadora interactiva para la remisión (puntuación QIDS-C  $\leq 5$ ) y ningún beneficio significativo (reducción del  $<30\%$  en la puntuación QIDS-C con respecto al valor basal) en la semana 8 con análisis de regresión logística en el ensayo CO-MED con participantes con datos completos (N=431) y replicado independientemente en el Estudio de Metodología y Evaluación de Suicidio (SAMS) (N=163).

**Resultados:** En el ensayo CO-MED, la irritabilidad se redujo significativamente (tamaño del efecto=1,06) desde el inicio hasta la semana 4, y esta reducción siguió siendo significativa

después de ajustar el cambio de QIDS-C (tamaño de efecto ajustado=0,36). Una reducción de una desviación estándar mayor en la puntuación CAST-IRR desde el inicio hasta la semana 4 predijo una probabilidad de remisión 1,73 veces más alta y una probabilidad 0,72 veces más baja de no obtener ningún beneficio significativo en la semana 8, independientemente de las puntuaciones iniciales en QIDS-C y CAST-TIR y la reducción en la puntuación QIDS-C desde el inicio hasta la semana 4. Las estimaciones del modelo para la remisión (área bajo la curva [AUC]=0,7) y ningún beneficio significativo (AUC=0,76) en el ensayo CO-MED se utilizaron para predecir la remisión (AUC=0,80) y ningún beneficio significativo (AUC=0,84) en SAMS y para desarrollar una calculadora interactiva.

**Conclusiones:** La irritabilidad es un dominio de síntomas importante para el trastorno de depresión mayor que no se ve completamente reflejado en las medidas de la gravedad de los síntomas depresivos. Las reducciones tempranas de irritabilidad, cuando se combinan con cambios en la gravedad de los síntomas depresivos, ofrecen una estimación robusta de la probabilidad de remisión o ningún beneficio significativo en pacientes ambulatorios con depresión mayor.

(*Am J Psychiatry* 2019; 176:358–366)

## Trayectorias de respuesta a EMTr prefrontal dorsolateral en depresión mayor: Un estudio TRES-D

Tyler S. Kaster, M.D., Jonathan Downar, M.D., Ph.D., Fidel Vila-Rodriguez, M.D., Ph.D., Kevin E. Thorpe, M.Math., Kfir Feffer, M.D., Yoshihiro Noda, M.D., Ph.D., Peter Giacobbe, M.D., Yuliya Knyahnytska, M.D., Ph.D., Sidney H. Kennedy, M.D., Ph.D., Raymond W. Lam, M.D., Zafiris J. Daskalakis, M.D., Ph.D., Daniel M. Blumberger, M.D., M.Sc.

**Objetivo:** La estimulación magnética transcraneana repetitiva (EMTr) es un tratamiento efectivo para el trastorno de depresión mayor refractario, pero ningún estudio ha caracterizado las trayectorias de respuesta a la EMTr. El objetivo de este estudio fue caracterizar las trayectorias de respuesta para pacientes con depresión mayor a quienes se les estuviera haciendo EMTr en la corteza prefrontal dorsolateral izquierda y determinar características clínicas asociadas en la línea basal.

**Método:** Este fue un análisis secundario de un ensayo de no inferioridad aleatorizado (N=388) que comparó EMTr convencional de 10-Hz con EMTr intermitente de ráfagas theta (iTBS, por sus siglas en inglés). Los participantes fueron pacientes ambulatorios adultos que tuvieron un diagnóstico primario de trastorno de depresión mayor, una puntuación  $\geq 18$  en la Escala de Evaluación de la Depresión de Hamilton (HAM-D) de 17 ítems y que no respondieron a uno de tres ensayos adecuados con antidepresivos. El tratamiento fue EMTr de 10-Hz convencional o EMTr iTBS aplicada a la corteza prefrontal dorsolateral, 5 días/semana por 4–6 semanas (20–30 sesiones). Se aplicó la modelación de trayectorias basadas en grupo para identificar las trayectorias de respuesta de la escala HAM-D y se emplearon técnicas de regresión para identificar características asociadas.

**Resultados:** Se identificaron cuatro trayectorias: ninguna respuesta (N=43, 11%); respuesta rápida (N=73, 19%); respuesta lineal con síntomas basales más altos (N=118, 30%); y respuesta lineal con síntomas basales más bajos (N=154, 40%). Después de la semana 1 fueron detectables diferencias significativas en las tasas de respuesta y de remisión entre trayectorias. No hubo ninguna asociación entre el protocolo de tratamiento y la trayectoria de respuesta. Las puntuaciones altas en la escala HAM-D y el Inventario Rápido de Sintomatología de Depresión-Autoreportado (QIDS-SR, por sus siglas en inglés) obtenidas al inicio del estudio se asociaron a la trayectoria de ninguna respuesta. La mayor edad, menor puntuación en QID-SR y la falta del uso de benzodiazepinas se asociaron a una trayectoria de respuesta rápida.

**Conclusiones:** La depresión mayor muestra claras trayectorias de respuesta a la EMTr, asociadas a las características de antes del tratamiento (línea base) pero no al protocolo de tratamiento. Estas trayectorias de respuesta con respuesta diferencial a la EMTr plantean la posibilidad de desarrollar protocolos de tratamiento individualizados.

(*Am J Psychiatry* 2019; 176:367–375)

# No hay respaldo para las hipótesis de genes candidatos históricos ni de genes candidatos por interacción para la depresión mayor en múltiples muestras grandes

Richard Border, M.A., Emma C. Johnson, Ph.D., Luke M. Evans, Ph.D., Andrew Smolen, Ph.D., Noah Berley, Patrick F. Sullivan, M.D., Matthew C. Keller, Ph.D.

**Objetivo:** Sigue habiendo gran interés en las hipótesis de genes candidatos y de interacción entre los genes candidatos y el entorno con respecto al trastorno de depresión mayor, a pesar de la polémica alrededor de la validez de los hallazgos anteriores. En respuesta a esta polémica, la presente investigación identificó empíricamente 18 genes candidatos para la depresión que se han estudiado 10 veces o más y examinaron las pruebas de su importancia para los fenotipos de la depresión.

**Método:** Utilizando datos de grandes muestras basadas en la población y de muestras de casos y controles (N que van de 62.138 a 443.264 en las diferentes submuestras), los autores realizaron una serie de análisis pre-registrados que examinaron los efectos principales de los polimorfismos de los genes candidatos, las interacciones entre polimorfismo y entorno, y los efectos a nivel de genes con varias definiciones operativas de depresión (p. ej., diagnóstico de por vida, gravedad actual, recurrencia de episodios) y moderadores ambientales (p. ej., abuso sexual o físico durante la infancia, adversidad socio-económica).

**Resultados:** No se encontró evidencia clara de asociaciones de polimorfismos de genes candidatos con los fenotipos de depresión ni ningún efecto moderador de interacción entre polimorfismo y entorno. Como grupo, los genes candidatos para depresión no estuvieron más asociados a los fenotipos de la depresión que los genes no candidatos. Los autores demuestran que probablemente el error de medida fenotípico no explique estos hallazgos nulos.

**Conclusiones:** Los resultados del estudio no apoyan los hallazgos previos sobre los genes candidatos para depresión, en los que frecuentemente se reportan grandes efectos genéticos en muestras de magnitud inferior a las que se examinaron aquí. En lugar de esto, los resultados sugieren que las hipótesis tempranas acerca de los genes candidatos para depresión eran incorrectas y que el gran número de asociaciones reportadas en la literatura sobre los genes candidatos para la depresión probablemente son falsos positivos.

(*Am J Psychiatry* 2019; 176:376–387)

## Papel de la señalización neuronal del VEGF en la corteza prefrontal en los efectos antidepresivos rápidos de la ketamina

Satoshi Deyama, Ph.D., Eunyoung Bang, M.S., Eric S. Wohleb, Ph.D., Xiao-Yuan Li, M.S., Taro Kato, Ph.D., Danielle M. Gerhard, Ph.D., Sophie Dutheil, Ph.D., Jason M. Dwyer, Ph.D., Seth R. Taylor, Ph.D., Marina R. Picciotto, Ph.D., Ronald S. Duman, Ph.D.

**Objetivo:** La ketamina, antagonista del receptor *N*-metil-D-aspartato, produce acciones antidepresivas rápidas y sostenidas incluso en pacientes con depresión resistente al tratamiento. El factor de crecimiento endotelial vascular (VEGF, por sus siglas en inglés) ha estado implicado en los efectos de los antidepresivos convencionales basados en las monoaminas, pero sigue sin estar claro el papel del VEGF en las acciones antidepresivas rápidas de la ketamina. Los autores examinaron si la señalización neuronal del VEGF en la corteza prefrontal medial (CPFm) media las acciones antidepresivas rápidas de la ketamina.

**Método:** Los autores utilizaron una combinación de enfoques, incluyendo el knockout condicional, específico de la neurona del VEGF o su receptor, Flk-1; neutralización de anticuerpos; knockdown de Flk-1 mediado por virus; e inhibidores farmacológicos. Se realizaron más experimentos *in vitro* e *in vivo* para examinar si la señalización neuronal del VEGF era requerida por las acciones neurotróficas y sinaptogénicas de la ketamina que subyacen sus acciones comportamentales.

**Resultados:** Las acciones de la ketamina sistémica sobre el comportamiento son bloqueadas por la delección excitatoria específica de las neuronas en el prosencéfalo (cerebro primitivo anterior) del VEGF o de Flk-1 o por infusión intra-CPFm de un anticuerpo neutralizador del VEGF. Además, las infusiones intra-CPFm del VEGF son suficientes para producir acciones sobre el comportamiento como las de la ketamina, y estos efectos son bloqueados por la delección de Flk-1 específica de la neurona. Los resultados también muestran que el 'knockdown' local de Flk1 en neuronas excitatorias en la edad adulta bloquea los efectos de la ketamina sistémica sobre el comportamiento. Además, la inhibición de la señalización neuronal del VEGF bloquea los efectos neurotróficos y sinaptogénicos de la ketamina.

**Conclusiones:** En conjunto, estos hallazgos indican que la señalización neuronal de VEGF-Flk-1 en la CPFm juega un papel esencial en las acciones antidepresivas de la ketamina.

(*Am J Psychiatry* 2019; 176:388–400)



# Infusiones de ketamina sencillas, repetidas y de mantenimiento para la depresión resistente al tratamiento: Un ensayo controlado aleatorizado

Jennifer L. Phillips, Ph.D., Sandhya Norris, M.D., Jeanne Talbot, M.D., Ph.D., Meagan Birmingham, M.A., M.B.A., Taylor Hatchard, Ph.D., Abigail Ortiz, M.D., Olabisi Owoeye, M.D., Lisa A. Batten, Ph.D., Pierre Blier, M.D., Ph.D.

**Objetivo:** Se ha mostrado que dosis de ketamina subanestésicas tienen efectos antidepresivos rápidos, si bien transitorios, en pacientes con depresión resistente al tratamiento, que pueden prolongarse con administración repetida. El propósito de este estudio fue evaluar los efectos antidepresivos de una única infusión de ketamina, una serie de infusiones de ketamina repetidas, y el prolongamiento de la respuesta con infusiones de mantenimiento.

**Método:** Cuarenta y un pacientes con depresión resistente al tratamiento completaron una comparación cruzada, doble ciega aleatorizada y en un solo lugar, de una única infusión de ketamina y de midazolam (un control placebo activo). Luego de una recaída de síntomas depresivos, los participantes recibieron una serie de seis infusiones de ketamina de etiqueta abierta administrada tres veces por semana durante 2 semanas. Los individuos que respondieron, clasificados como aquellos participantes que tuvieron una reducción de  $\geq 50\%$  en sus puntuaciones en la escala de Evaluación de Depresión de Montgomery-Åsberg (MADRAS), recibieron cuatro infusiones adicionales administradas una vez por semana (fase de mantenimiento).

**Resultados:** En comparación con el midazolam, una única

infusión de ketamina provocó una reducción significativamente mayor de los síntomas depresivos en la variable primaria de eficacia (24 horas post-infusión). Modelos lineales mixtos revelaron efectos antidepresivos acumulativos con infusiones repetidas y el doble de la tasa de respuesta a los antidepresivos. Cincuenta y nueve por ciento de los participantes cumplieron los criterios de respuesta después de las infusiones repetidas, con una mediana de tres infusiones necesarias antes de alcanzar la respuesta. Los participantes no tuvieron más cambios en las puntuaciones en MADRS durante las infusiones semanales de mantenimiento.

**Conclusiones:** Las infusiones repetidas de ketamina tienen efectos antidepresivos acumulativos y sostenidos. En los individuos que respondieron, las reducciones de síntomas depresivos se mantuvieron durante el período en que recibieron una infusión semanal. Estos hallazgos brindan nuevos datos sobre las estrategias eficaces de administración de ketamina en pacientes con depresión resistente al tratamiento. Futuros estudios deben seguir investigando como optimizar la administración para traducir mejor el uso de la ketamina en entornos clínicos.

(*Am J Psychiatry* 2019; 176:401–409)
