# The American Journal of Psychiatry

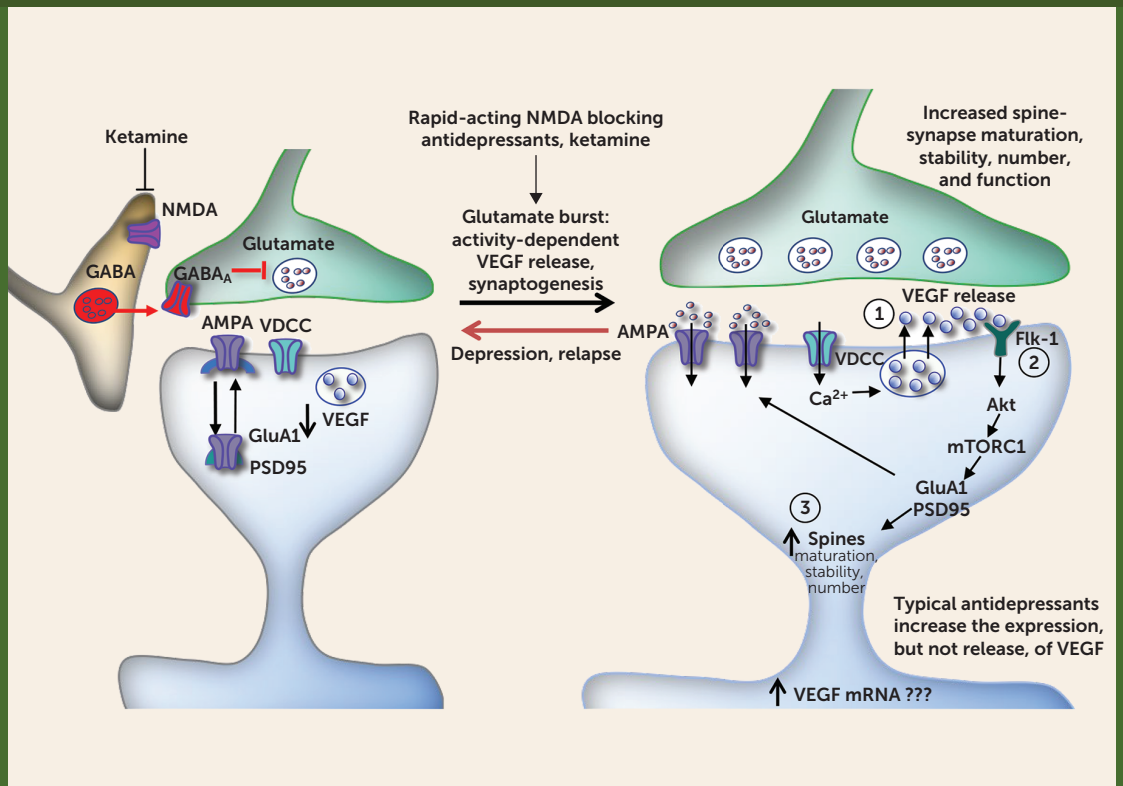

## Role of Neuronal VEGF Signaling in the Prefrontal Cortex in the Rapid Antidepressant Effects of Ketamine

Scientific Issues Relevant to Improving the Diagnosis,  
Risk Assessment, and Treatment of Major Depression

Irritability and Its Clinical Utility in Major Depressive Disorder

No Support for Historical Candidate Gene or Candidate  
Gene-by-Interaction Hypotheses for Major Depression  
Across Multiple Large Samples
